# Supplementary material for: Interface design for enhancing the wettability of liquid metal to polyacrylate for intrinsically soft electronics
Source: Royal Society of Chemistry journal article supplement (doi:10.1039/c8tc02003e), 2018-01-01
Supplement: c8tc02003e1.pdf [file c8tc02003e1.pdf]

## Supporting Information

### Interface Design for Enhancing the Wettability of Liquid Metal to Polyacrylate for Intrinsically Soft Electronics

Yun-hui Wu, Shu-ting Xing, Rong-min Zheng, Shu-qi Liu, Hai-zhou Liu, Zhi-fu

Deng, Ping-ping Wang, and Lan Liu\*

College of Materials Science and Engineering, Key Lab of Guangdong Province for  
High Property and Functional Macromolecular Materials, South China University of  
Technology, Guangzhou 510641, PR China.

\*E-mail: [pqliulan@scut.edu.cn](mailto:pqliulan@scut.edu.cn)

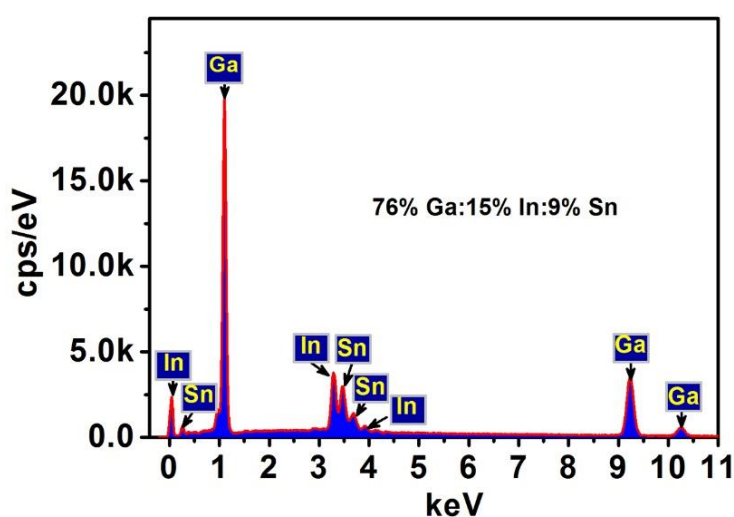

**Figure S1.** The chemical ingredient analysis of EGaInSn with the ratio of Ga weight content to In and Sn is 76: 15: 9.

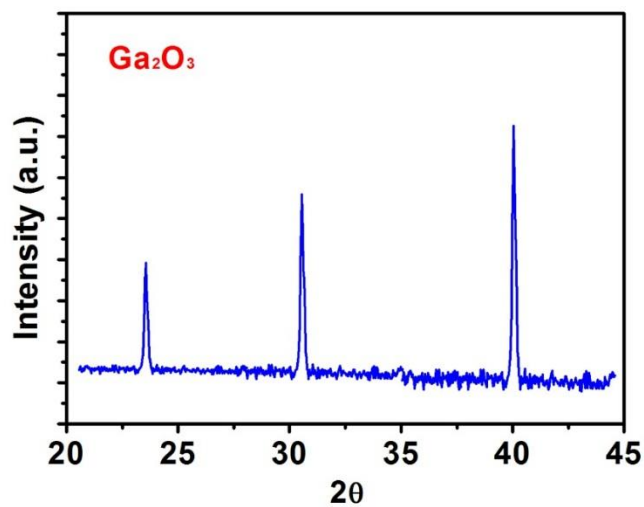

**Figure S2.** XRD spectrum of the gallium-oxide, which rapidly formed on LM surface when exposed to oxygen, and the atomically thin film of gallium-oxide is very robust and can mechanically stabilize the liquid metal against deformations.

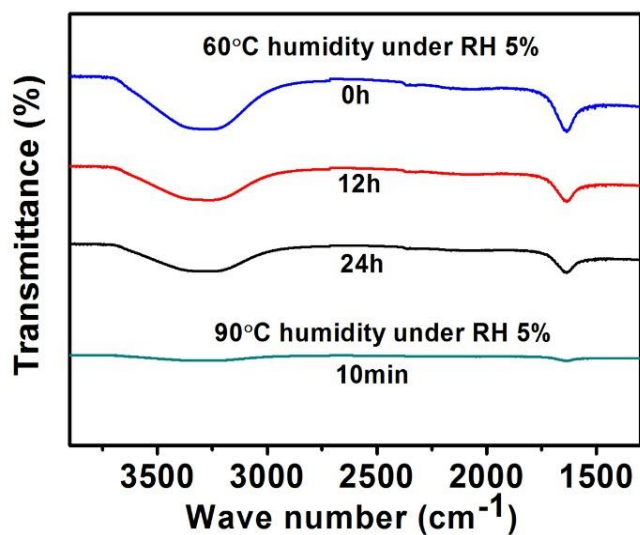

**Figure S3.** the stability of water molecules sticking on  $\text{Ga}_2\text{O}_3$  surface at  $60^\circ\text{C}$  and  $90^\circ\text{C}$  and under RH 5%.

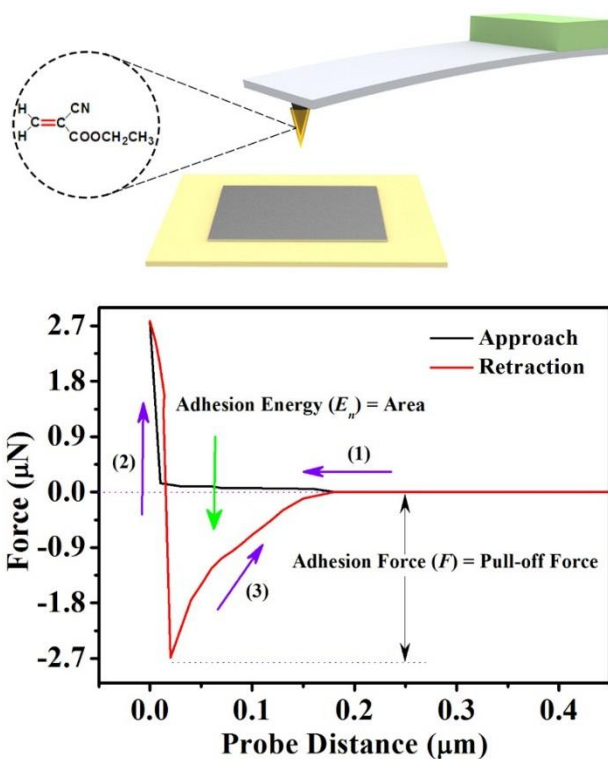

**Figure S4.** The force-distance curve of the probe coated with ethyl-2-cyanoacrylate approached the EGaInSn without absorbed hydron, the the adhesion force still in low value of 2.7 $\mu$ N due to the non-interfacial polymerization of ethyl-2-cyanoacrylate.

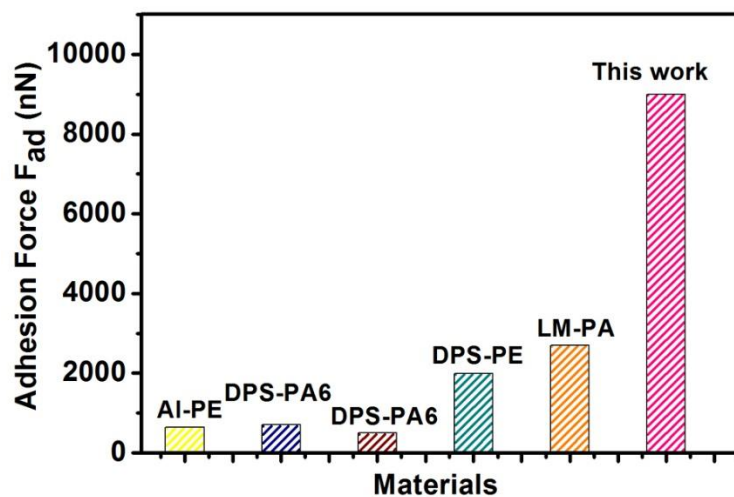

**Figure S5.** Comparison of different adhesion force between PE/PA6 substrate and Al/DPS/LM, noticeably, PACA can effectively enhance the adhesion force between LM and PA in our work.<sup>27</sup>

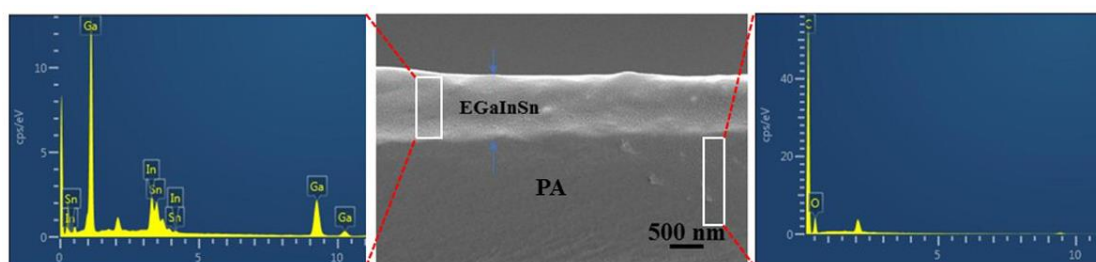

**Figure S6.** The morphology and the elements analysis of EGaInSn@PA showing that EGaInSn conductive layer the thickness was about 1  $\mu\text{m}$  without the adhesive layer.
